# Supplementary material
Source: PubMed Central journal article supplement (PMC544280)

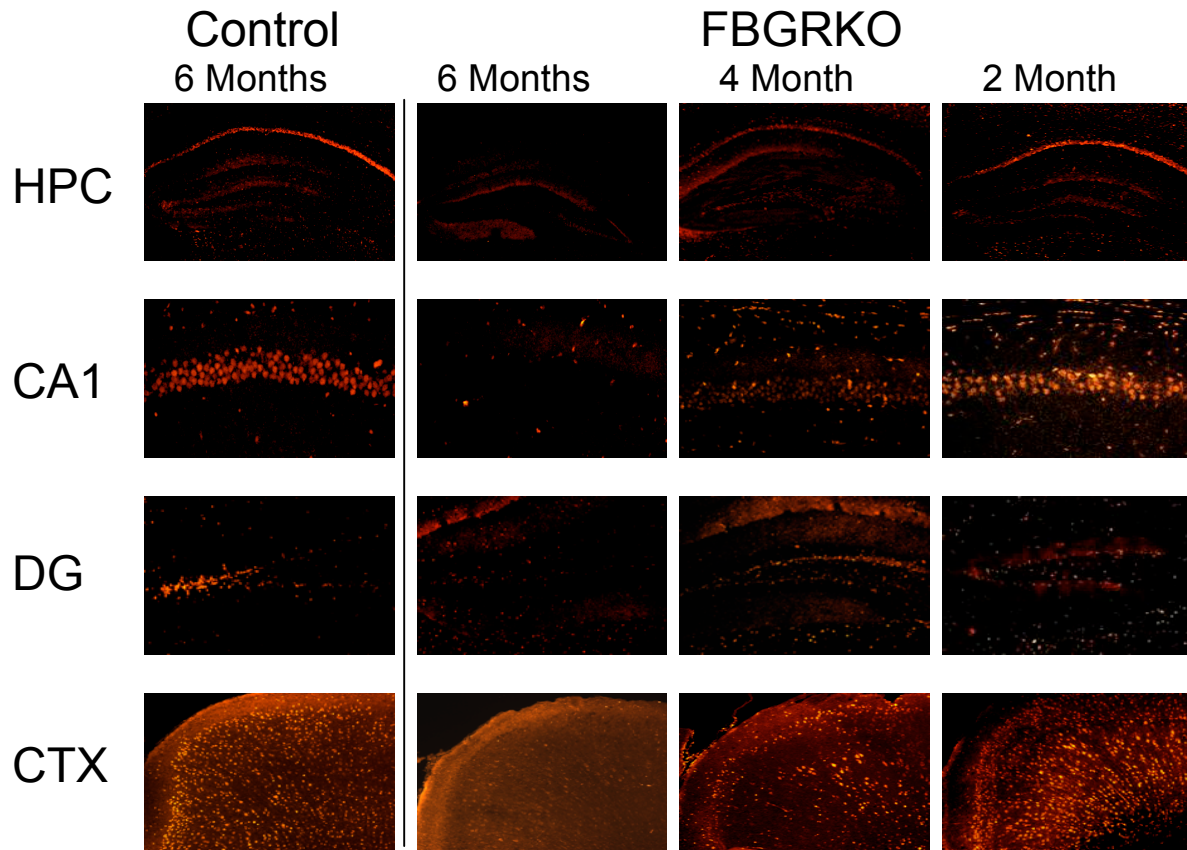

Supplement: pnas_102_2_473__2.pdf [file pnas_102_2_473__2.pdf]
